# Supplementary material for: Flecainide ameliorates arrhythmogenicity through NCX flux in Andersen-Tawil syndrome-iPS cell-derived cardiomyocytes
Source: PubMed Central journal article supplement — Biochem Biophys Rep. 2017 Jan 11;9:245–56. doi: 10.1016/j.bbrep.2017.01.002 (PMC5614591; doi:10.1016/j.bbrep.2017.01.002), 2017-01-11

# **SUPPLEMENTAL MATERIAL**

### **Supplementary Figure 1. Generation of iPSCs from three patients with ATS**

Immunofluorescence staining for stem cell markers (Tra1-81, NANOG, OCT3/4, and SSEA3) in independent iPSC clones of each ATS case. Nuclei were counterstained with DAPI.

### **Supplementary Figure 2. Teratoma formation by ATS-iPSCs**

Microscopic observation of teratoma sections, showing tissue structures resembling gut (endoderm), cartilage (mesoderm), adipose (mesoderm), and neural tissue (ectoderm).

### **Supplementary Figure 3. Cardiomyocyte differentiation from iPSCs**

Immunofluorescence staining for cardiomyocyte markers ( $\alpha$ -actinin, ANP, cardiac troponin T (cTnT), and GATA4) in control- and ATS-iPSC-derived cardiomyocytes. Nuclei were counterstained with DAPI.

### **Supplementary Figure 4. Isoproterenol responses of ATS-iPSC-derived cardiomyocytes**

**a.** The rates of EBs with arrhythmic events in MEA analyses (control,  $n = 8$ ; R218W,  $n = 10$ ; R67W,  $n=3$ ; R218Q,  $n=13$ , Fisher's exact probability test). **b.** Representative MEA recordings after isoproterenol and flecainide administration in ATS-iPSC-derived beating EBs(R67W, R218Q). **c.** The incidences of EBs with arrhythmic events after isoproterenol (1000 nM) and flecainide (5  $\mu$ M) administration by MEA analysis (control,  $n = 9$ ; R218W,  $n = 11$ ; R67W,  $n=19$ ; R218Q,  $n=8$ , Fisher's exact probability test). **d.** Representative MEA recordings after flecainide (5  $\mu$ M) and isoproterenol (1000 nM) in ATS-iPSC-derived cardiomyocytes.

### **Supplementary Figure 5. $\text{Ca}^{2+}$ transients in ATS-iPSC-derived cardiomyocytes and irregular $\text{Ca}^{2+}$ release caused by diastolic $\text{Ca}^{2+}$ overload**

**a.** Representative line scan images of spontaneous  $\text{Ca}^{2+}$  transients in control- and ATS-iPSC-derived single cardiomyocytes (R67W, R218Q). Arrowhead indicates the irregular  $\text{Ca}^{2+}$  release. **b.** Representative line scan images of  $\text{Ca}^{2+}$  transients paced at 1 Hz in control- and ATS-iPSC-derived single cardiomyocytes (R67W, R218Q). **c.** The rates of cardiomyocytes with irregular  $\text{Ca}^{2+}$  release after CPA administration in control- ( $n = 52$ ) and ATS-iPSC-derived cardiomyocytes ( $n = 48$ ) (control, 25.0% increase in incidence,  $**P < 0.01$  vs. control by Fisher's exact probability test; ATS, 6.3% increase in incidence) **d.** Representative line scan images of spontaneous  $\text{Ca}^{2+}$  transients in control-iPSC-derived single cardiomyocytes after caffeine administration. Arrow indicates the timing of caffeine administration. **e.** SR  $\text{Ca}^{2+}$  content after flecainide administration in control- and ATS-iPSC-derived cardiomyocytes, determined by caffeine-induced  $\Delta F/F_0$  (control; baseline,  $n = 6$ ,  $1.27 \pm 0.16$ , flecainide,  $n = 7$ ,  $1.27 \pm 0.28$ , ATS; baseline,  $n = 14$ ,  $1.31 \pm 0.11$ , flecainide,  $n = 18$ ,  $1.42 \pm 0.12$ , Data are mean  $\pm$  SEM.). **f, h.** Representative line scan images of spontaneous  $\text{Ca}^{2+}$  transients at baseline in ATS-iPSC-derived single cardiomyocytes (R67W, R218Q). **g, i.** Representative line scan images of spontaneous  $\text{Ca}^{2+}$  transients after flecainide (500 nM) administration in

ATS-iPSC-derived single cardiomyocytes (R67W, R218Q).

**Supplementary Figure 6. Drug effects on ATS-iPSC-derived cardiomyocytes**

**a.** The incidences of cardiomyocytes with irregular  $\text{Ca}^{2+}$  release after SEA0400 administration ( $*P < 0.05$  vs. baseline by Fisher's exact probability test.  $n = 17$ ). **b.** The incidences of cardiomyocytes with irregular  $\text{Ca}^{2+}$  release after JTV519 administration (vs. baseline by Fisher's exact probability test.  $n = 13$ ).

**Supplementary Table 1. Primer sets for genomic PCR of *KCNJ2***

| Forward                        | Reverse                        |
|--------------------------------|--------------------------------|
| 5'-GAACATTCAAAACTGTTTCTCCAA-3' | 5'-AGAGCTATCAACCAAAACACACAG-3' |
| 5'-GTGGATGCTGGTTATCTTCTGC-3'   | 5'-GCATTGTGACTGAAGACAAGAGTC-3' |
| 5'-CATCATCGATGCTTTCATCATT-3'   | 5'-ATTTCAAAGTCTGCGTTGTCAAT-3'  |
| 5'-CCATGAAATAGATGAAGACAGTCC-3' | 5'-CTAGTGCTTTCTGGAACTCCATTT-3' |
| 5'-CTATGAAAATGAAGTTGCCCTCAC-3' | 5'-TGGAGACATGGTTAGTGCTTTATG-3' |

**Supplementary Table 2. The clinical characteristics of the patients**

|                    | Patient 1 | Patient 2 | Patient 3 |
|--------------------|-----------|-----------|-----------|
| KCNJ2 mutation     | R218W     | R67W      | R218Q     |
|                    | 652C>T    | 199C>T    | 653G>A    |
| Frequent PVCs      | +         | -         | -         |
| Periodic paralysis | -         | +         | +         |

**Supplementary Table 3. Drug responses in ATS-iPSC-derived cardiomyocytes**

|                       |              | ATS           |
|-----------------------|--------------|---------------|
| Anti-arrhythmic drugs | Flecainide   | effective     |
|                       | Pilsicainide | non-effective |
|                       | KB-R7943     | effective     |
|                       | SEA0400      | effective     |
|                       | JVT519       | non-effective |

# Supplementary Figure 1

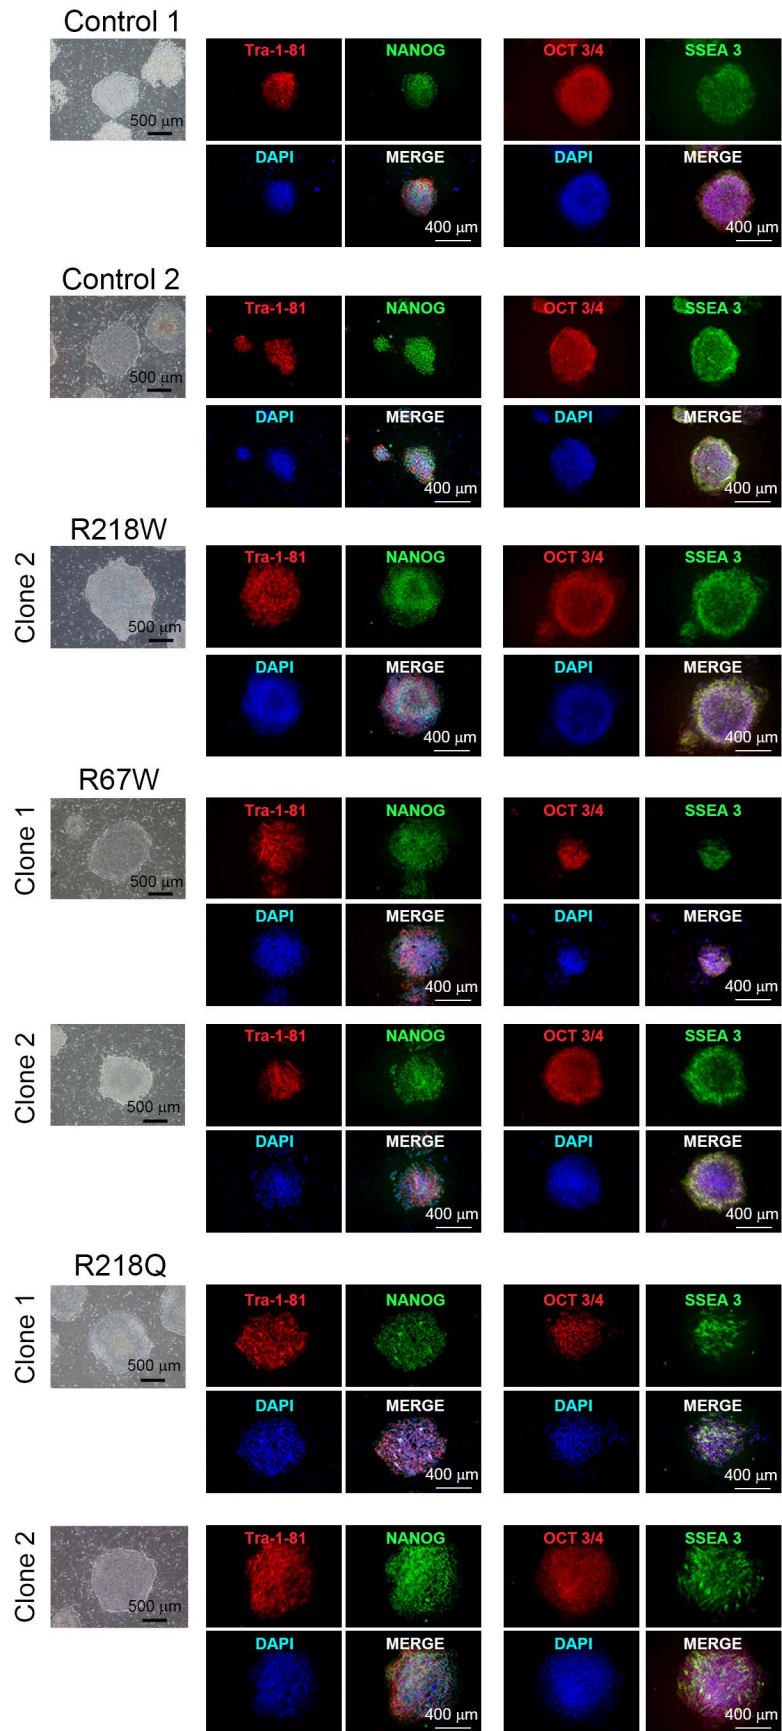

## Supplementary Figure 2

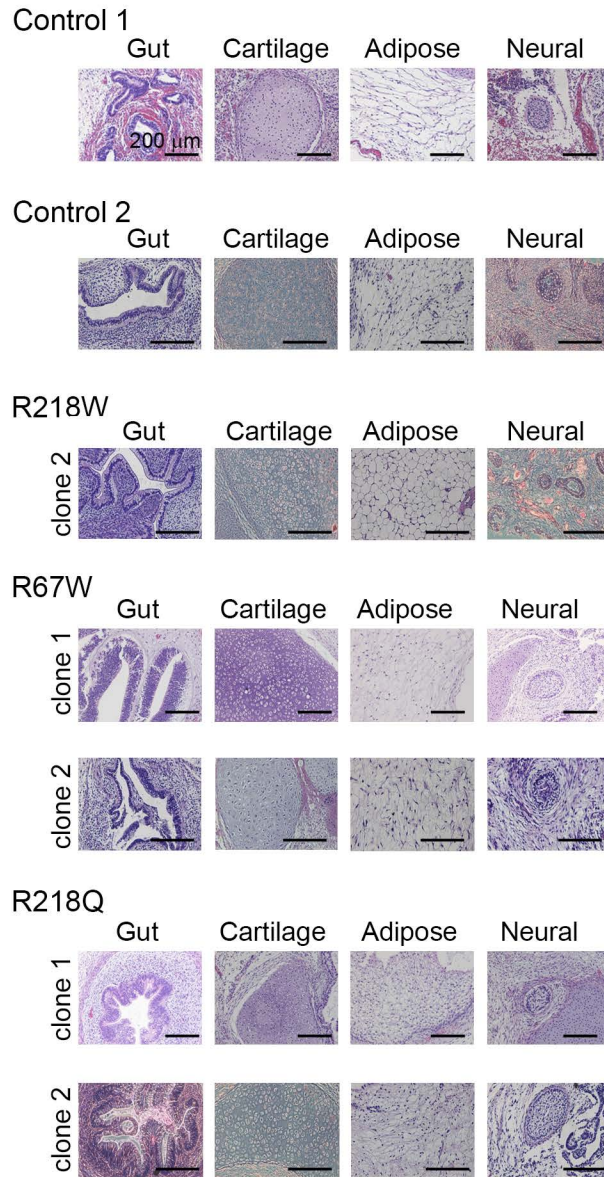

### Supplementary Figure 3

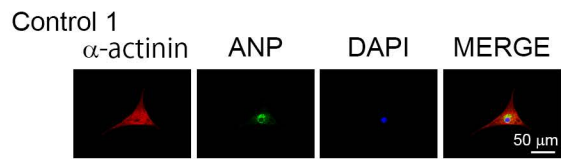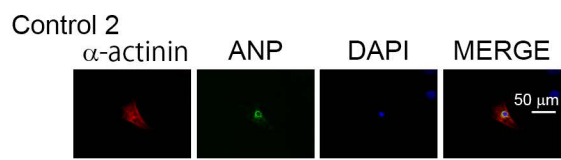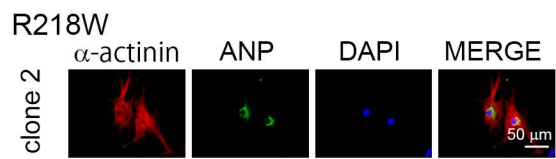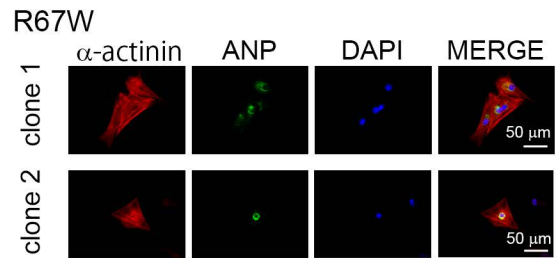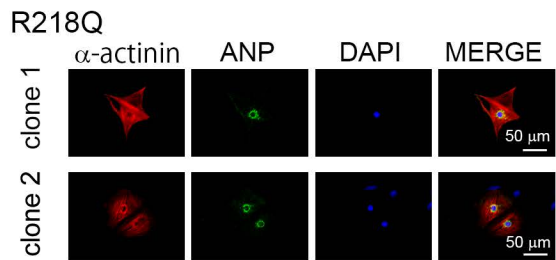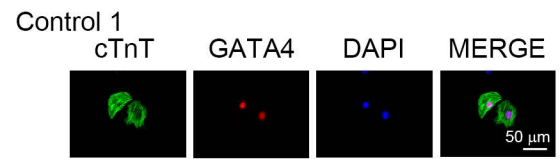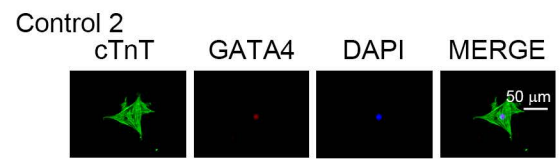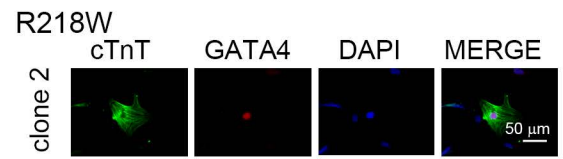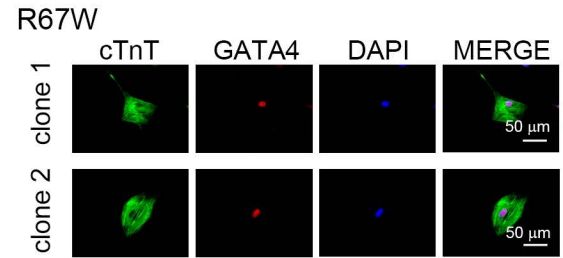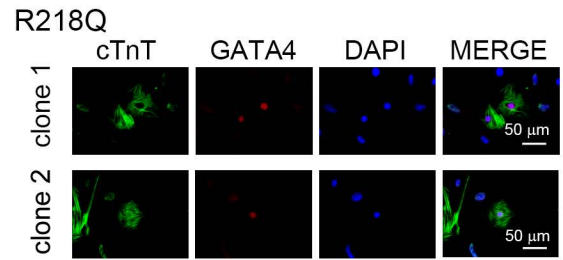

# Supplementary Figure 4

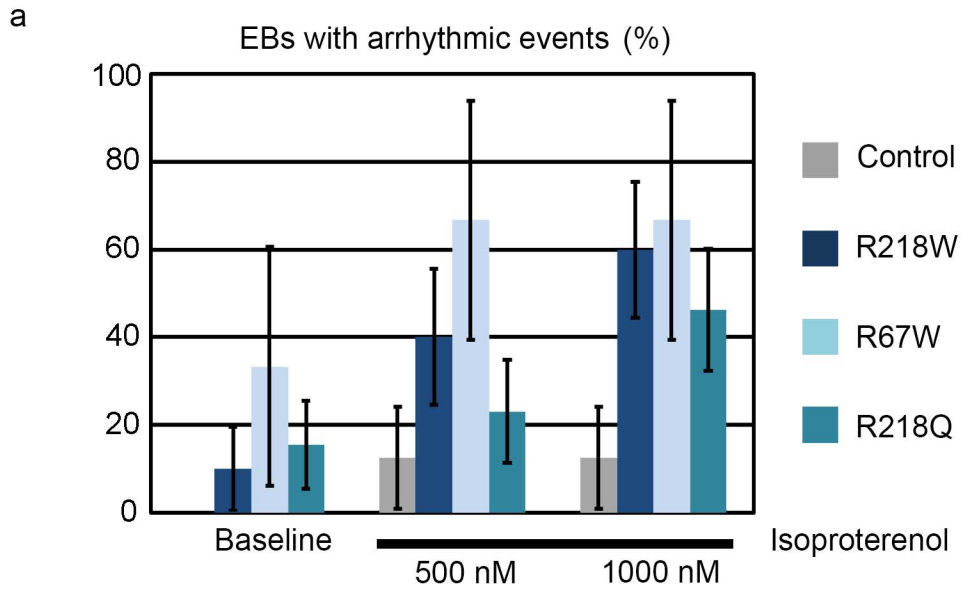

**b**

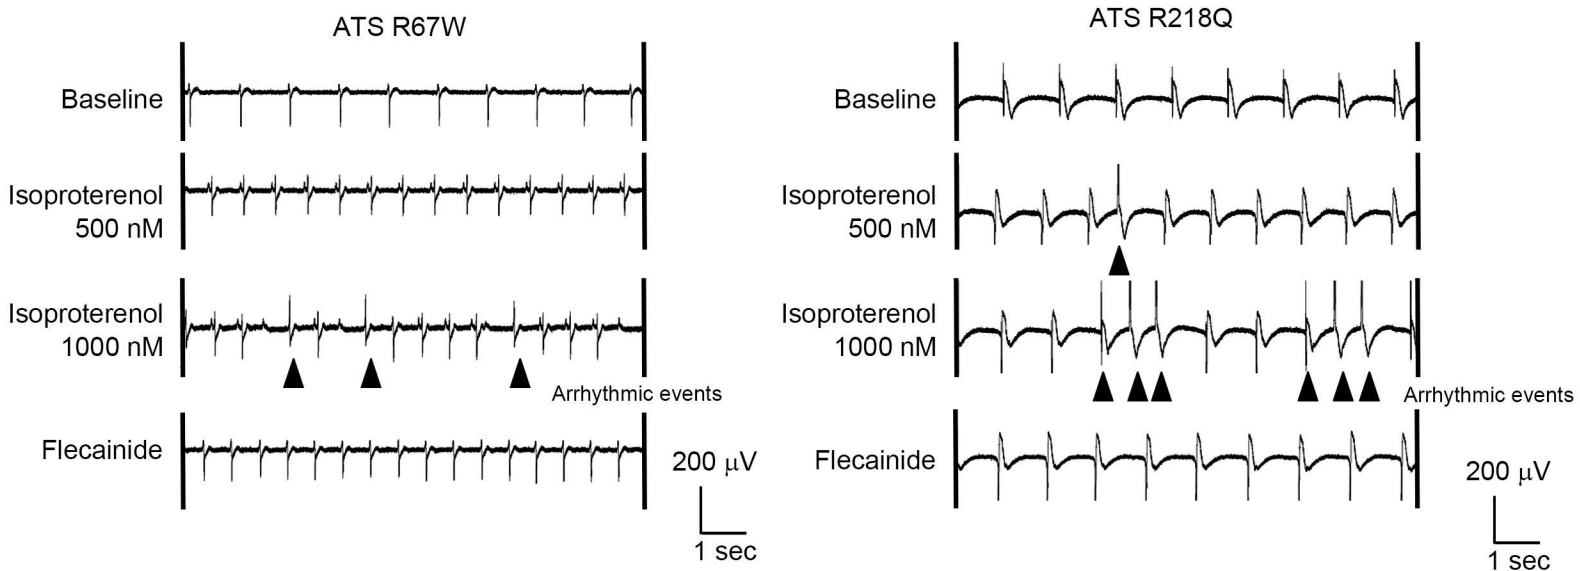

**c**

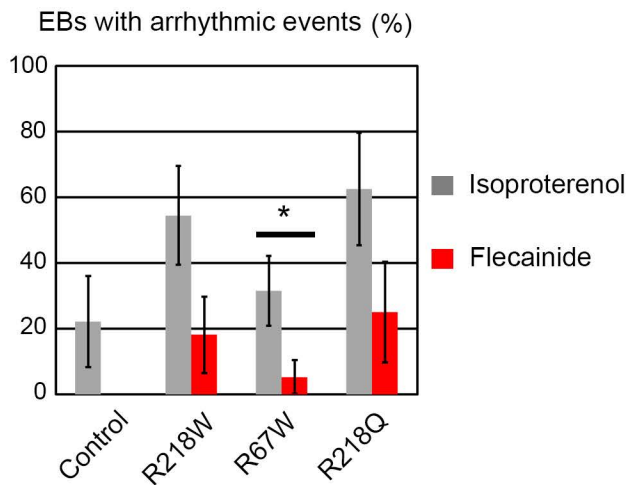

**d**

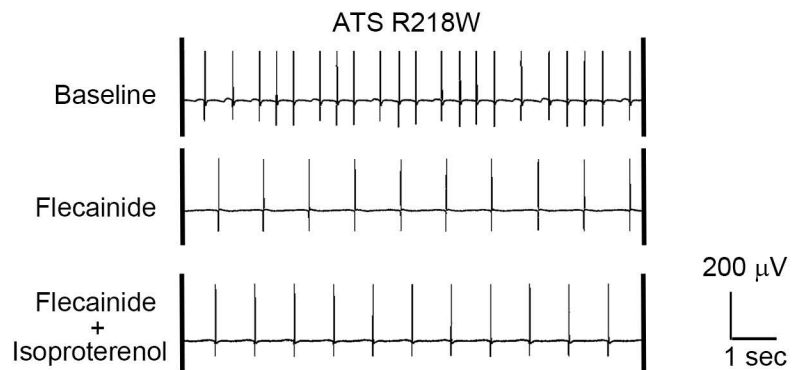



# Supplementary Figure 5

a

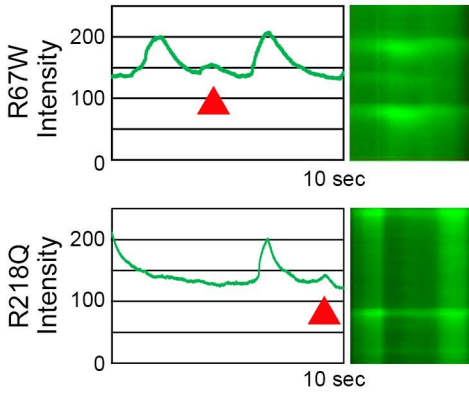

b

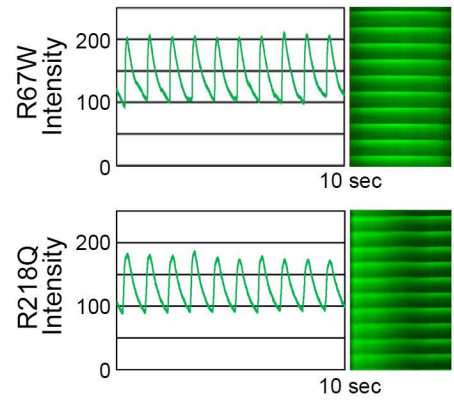

c

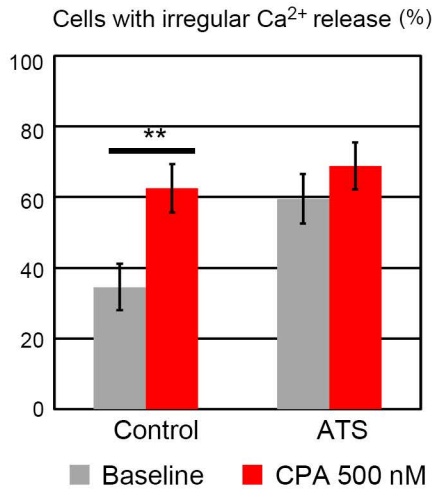

d

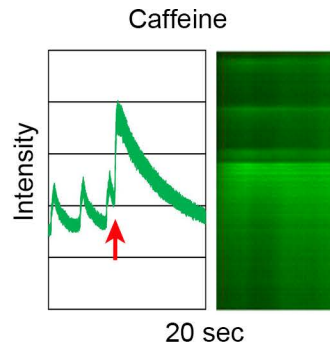

e

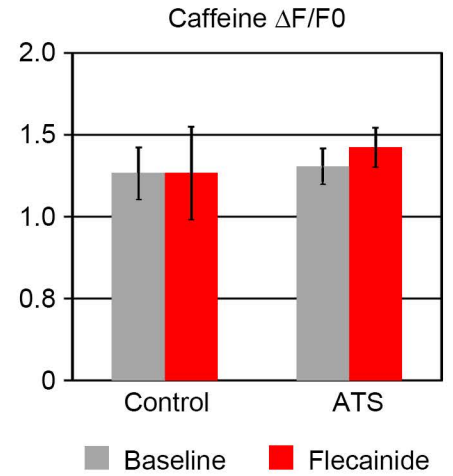

f

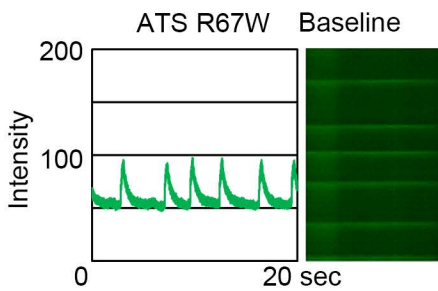

h

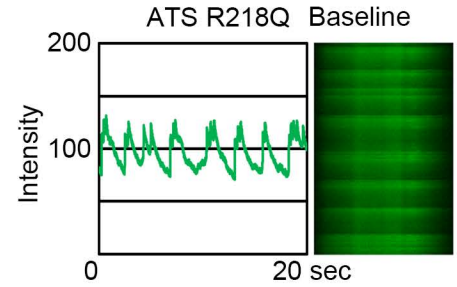

g

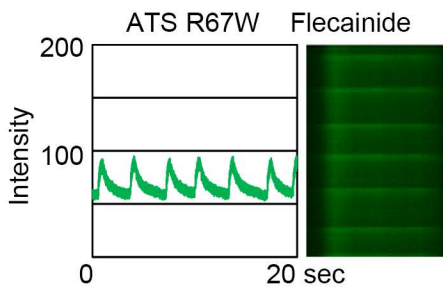

i

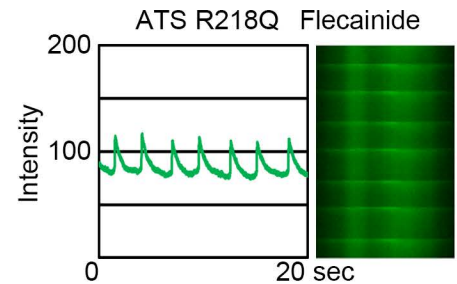

# Supplementary Figure 6

a

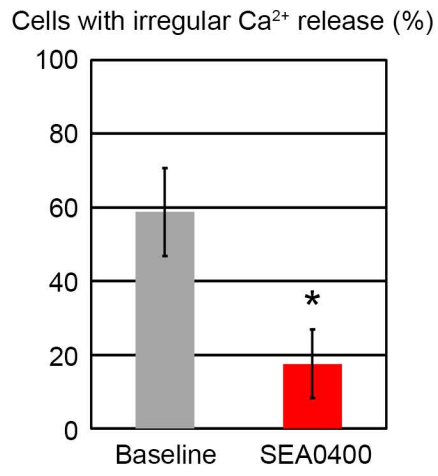

b

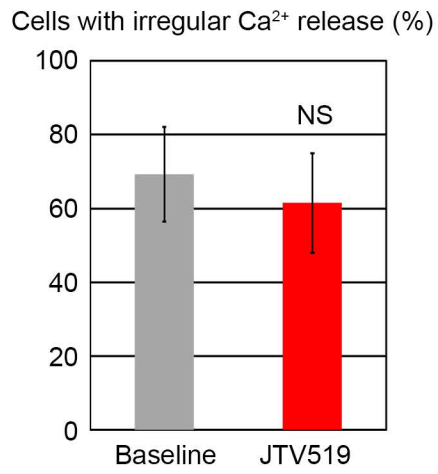

Supplement: mmc2.pdf [file mmc2.pdf]
